# Supplementary material for: Hazardous Effects of Curcumin on Mouse Embryonic Development through a Mitochondria-Dependent Apoptotic Signaling Pathway
Source: MDPI journal article supplement (doi:10.3390/ijms11082839), 2010-08-02
Supplement: s1 [file s1]

*Correction*

## **Hazardous Effects of Curcumin on Mouse Embryonic Development through a Mitochondria-Dependent Apoptotic Signaling Pathway**

*Published: 24 February 2011*

---

A new version of the paper [1] was uploaded today. We found that Figures 2B and 3B were not correct. We would like to apologize for any inconvenience caused to our readers.

*Int. J. Mol. Sci.* Editorial Office

### **References**

- 1 Chen, C.-C.; Hsieh, M.-S.; Hsuuw, Y.-D.; Huang, F.-J.; Chan, W.-H. Hazardous Effects of Curcumin on Mouse Embryonic Development through a Mitochondria-Dependent Apoptotic Signaling Pathway. *Int. J. Mol. Sci.* **2010**, *11*, 2839–2855.
